# Supplementary material for: Selective oxidation of bulky organic sulphides over layered titanosilicate catalysts
Source: Royal Society of Chemistry journal article supplement (doi:10.1039/c5cy02083b), 2016-01-01
Supplement: c5cy02083b1.pdf [file c5cy02083b1.pdf]

## Supporting Information

### Selective oxidation of bulky organic sulphides over layered titanosilicate catalysts

Jan Přečh<sup>1\*</sup>, Russell E. Morris<sup>2</sup>, Jiří Čejka<sup>1</sup>

J. Heyrovský Institute of Physical Chemistry, Academy of Sciences of the Czech Republic, v.v.i.,  
Dolejškova 3, CZ-182 23 Prague 8, Czech Republic

<sup>2</sup>EaStCHEM School of Chemistry, University of St Andrews, St Andrews KY16 9ST, UK

\*Corresponding author, e-mail: [jan.prech@jh-inst.cas.cz](mailto:jan.prech@jh-inst.cas.cz), phone: +420 266 053 856

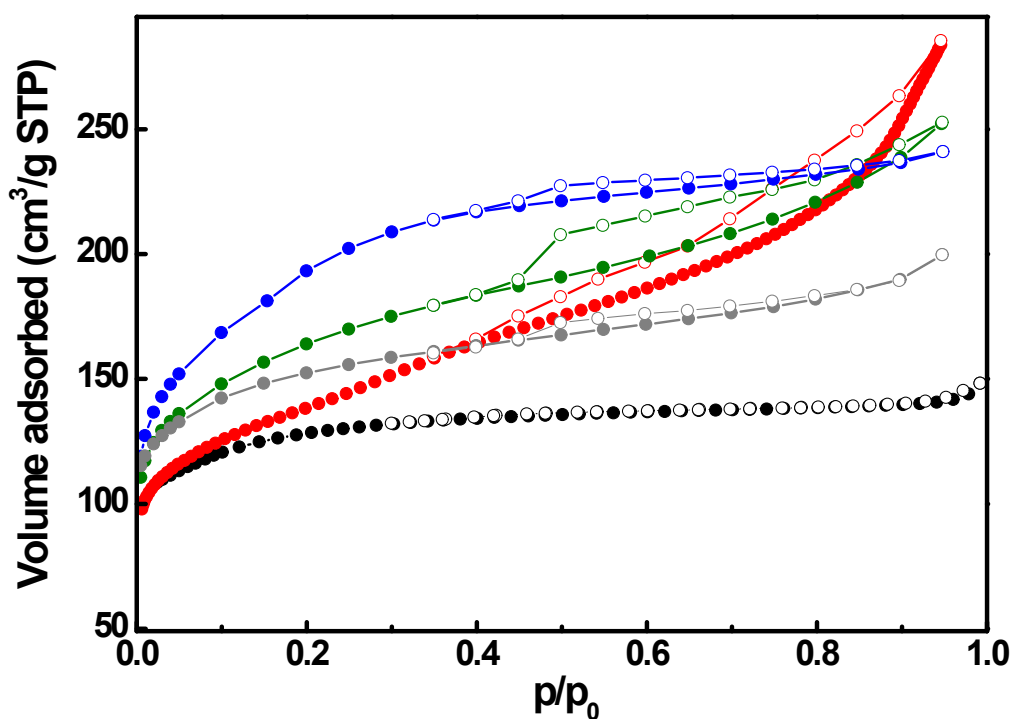

Figure S1: Nitrogen sorption isotherms for the TS-1 based catalysts. Gray: TS-1 (200), black: TS-1 (600), red: layered TS-1, blue: TS-1-PiSi, green: TS-1-PITi. Empty points denote desorption.

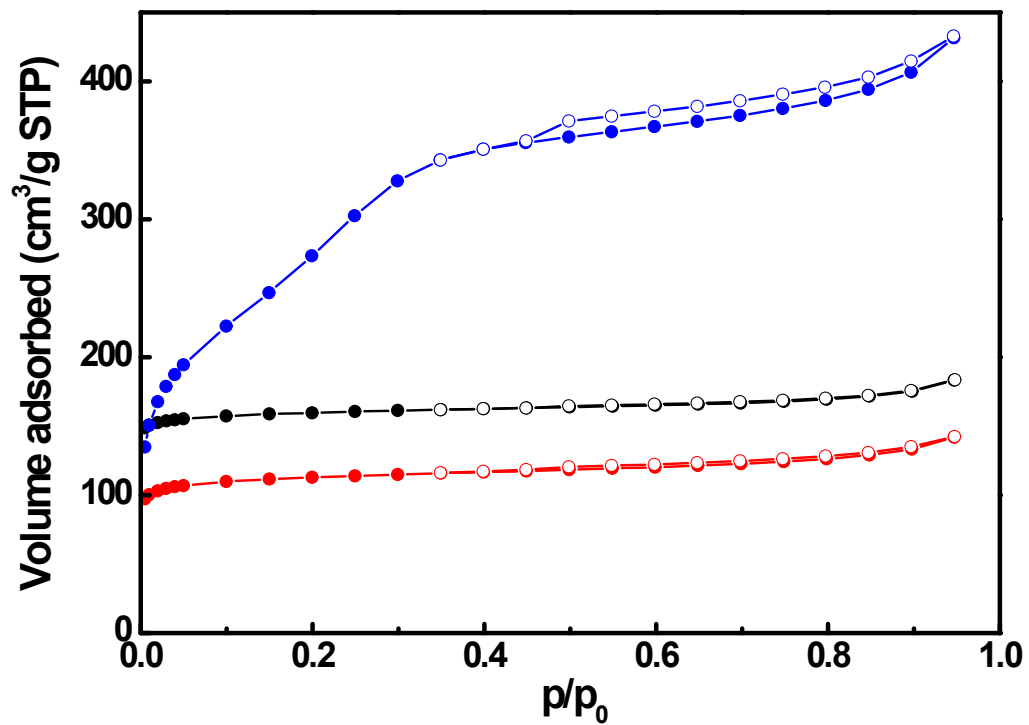

Figure S2: Nitrogen sorption isotherms for the UTL-based catalysts. Black: Ti-UTL, blue: Ti-IPC-1-PI, red: Ti-IPC-2.
